# Supplementary material for: Lost Keys: Understanding Service Providers’ Impressions of Frequent Visitors to Psychiatric Emergency Services in Singapore
Source: Atypon-hosted journal article supplement (doi:10.1176/appi.ps.201600165), 2016-11-15
Supplement: appi.ps.201600165.ds001.pdf [file appi.ps.201600165.ds001.pdf]

Online Supplement Table 1. Cut-offs for defining frequent use (n=16,123)

| Frequent user definitions                                     |        | %  |
|---------------------------------------------------------------|--------|----|
| 5+ visits in 2014 *                                           | n= 331 | 3  |
| Visits attributed to service seekers attending 5+             | 2,502  | 16 |
| 4+ visits in 3 months (Acute)                                 | n= 278 | 3  |
| Visits attributed to service seekers attending 4+ times in 3m | 2,102  | 13 |
| 4+ visits in 2014                                             | n= 598 | 6  |
| Visits attributed to service seekers attending 4+             | 3,570  | 22 |

\*definition used

Online Supplement Table 2. ICD-10 Diagnoses made as a result of visits to ED services, and the groups into which they were categorized.

| <b>ALCOHOL USE DISORDERS</b> |                                                                                                        |
|------------------------------|--------------------------------------------------------------------------------------------------------|
| F10                          | Mental and behavioural disorders due to use of alcohol                                                 |
| F105                         | Mental and behavioural disorders due to use of alcohol, psychotic disorder                             |
| F109                         | Mental and behavioural disorders due to use of alcohol, unspecified mental and behavioural disturbance |
| F100                         | Mental and behavioural disorders due to use of alcohol, acute intoxication                             |
| F102                         | Mental and behavioural disorders due to use of alcohol, dependence syndrome                            |
| <b>DRUG USE DISORDERS</b>    |                                                                                                        |
| Z722                         | Drug use                                                                                               |
| F559                         | Unspecified harmful use of non-dependence producing substance                                          |
| F129                         | Mental and behavioural disorders due to use of cannabinoids, unspecified mental                        |
| F131                         | Mental and behavioural disorders due to use of sedatives or hypnotics                                  |
| F159                         | Mental and behavioural disorders due to use of other stimulants, including caffeine                    |
| F132                         | Mental and behavioural disorders due to use of sedatives or hypnotics, dependence                      |
| F192                         | Mental and behavioural disorders due to multiple drug use and use of psychoactive substances           |
| <b>ADJUSTMENT DISORDER</b>   |                                                                                                        |

Z600 Problems of adjustment to life-cycle transitions

F432 Adjustment disorders

#### **CONDUCT DISORDERS**

F91 Conduct disorders

F910 Conduct disorder confined to the family context

F911 Unsocialised conduct disorder

F913 Oppositional defiant disorder

F918 Other conduct disorders

F92 Mixed disorders of conduct and emotions

F929 Mixed disorder of conduct and emotions, unspecified

F919 Conduct disorder, unspecified

#### **OBSERVATION**

Z039 Observation for suspected disease or condition, unspecified

Z028 Other examinations for administrative purposes

Z049 Examination and observation for unspecified reason

Z032 Observation for suspected mental and behavioural disorders

Z018 Other specified special examinations

#### **DELIRIUM**

R418 Other and unspecified symptoms and signs involving cognitive functions and awareness

F05 Delirium, not induced by alcohol and other psychoactive substances

F059 Delirium, unspecified

#### **OPIOID USE DISORDERS**

F112 Mental and behavioural disorders due to use of opioids, dependence syndrome  
Mental and behavioural disorders due to use of opioids, unspecified mental and

F119 behavioural disorder

#### **GAMBLING DISORDERS**

Z726 Gambling and betting

F630 Pathological gambling

#### **SCHIZOPHRENIA OR PSYCHOTIC DISORDERS**

F20 Schizophrenia

F202 Catatonic schizophrenia

F205 Residual schizophrenia

F206 Simple schizophrenia

F208 Other schizophrenia

F22 Persistent delusional disorders

F229 Persistent delusional disorder, unspecified

F23 Acute and transient psychotic disorders

F232 Acute schizophrenia-like psychotic disorder

F2320 Acute schizophrenia-like psychotic disorder without mention of associated acute

Other acute predominately delusional psychotic disorders without mention of associated acute

F2330

F239 Acute and transient psychotic disorder, unspecified

F28 Other nonorganic psychotic disorders

|       |                                                                                   |
|-------|-----------------------------------------------------------------------------------|
| F259  | Schizoaffective disorder, unspecified                                             |
| F200  | Paranoid schizophrenia                                                            |
|       | Other acute and transient psychotic disorders without mention of associated acute |
| F2380 |                                                                                   |
| F29   | Unspecified nonorganic psychosis                                                  |
| F220  | Delusional disorder                                                               |
| F209  | Schizophrenia, unspecified                                                        |

#### **ANXIETY DISORDERS**

|       |                                               |
|-------|-----------------------------------------------|
| F40   | Phobic anxiety disorders                      |
| F4000 | Agoraphobia without mention of panic disorder |
| F4001 | Agoraphobia with panic disorder               |
| F401  | Social phobias                                |
| F41   | Other anxiety disorders                       |
| F418  | Other specified anxiety disorders             |
| F410  | Panic disorder episodic paroxysmal anxiety    |
| F419  | Anxiety disorder, unspecified                 |

#### **PERSONALITY DISORDERS**

|       |                                                                                    |
|-------|------------------------------------------------------------------------------------|
| F60   | Specific personality disorders                                                     |
| F601  | Schizoid personality disorder                                                      |
| F603  | Emotionally unstable personality disorder                                          |
| F6031 | Emotionally unstable personality disorder, borderline type                         |
| F608  | Other specific personality disorders                                               |
| F600  | Paranoid personality disorder                                                      |
| F602  | Dissocial personality disorder                                                     |
| F609  | Personality disorder, unspecified                                                  |
|       | Personality and behavioural disorders due to brain disease, damage and dysfunction |
| F07   |                                                                                    |
| F070  | Organic personality disorder                                                       |

#### **DISORDERS WITH ONSET USUALLY OCCURRING IN CHILDHOOD**

|      |                                                                                               |
|------|-----------------------------------------------------------------------------------------------|
| R480 | Dyslexia and alexia                                                                           |
| F909 | Hyperkinetic disorder, unspecified                                                            |
| F939 | Childhood emotional disorder, unspecified                                                     |
| F95  | Tic disorders                                                                                 |
| F952 | Combined vocal and multiple motor tic disorder de la Tourette                                 |
| F959 | Tic disorder, unspecified                                                                     |
|      | Other behavioural and emotional disorders with onset usually occurring in childhood           |
| F98  |                                                                                               |
|      | Other specified behavioural and emotional disorders with onset usually occurring in childhood |
| F988 |                                                                                               |
|      | Unspecified behavioural and emotional disorders with onset usually occurring in childhood     |
| F989 |                                                                                               |
| F938 | Other childhood emotional disorders                                                           |
| F93  | Emotional disorders with onset specific to childhood                                          |

#### **DEPRESSIVE DISORDERS**

|       |                                                                                                        |
|-------|--------------------------------------------------------------------------------------------------------|
| F32   | Depressive episode                                                                                     |
| F320  | Mild depressive episode                                                                                |
| F3200 | Mild depressive episode, not specified as arising in the postnatal period                              |
| F322  | Severe depressive episode without psychotic symptoms                                                   |
| F323  | Severe depressive episode with psychotic symptoms                                                      |
| F3290 | Depressive episode, unspecified, not specified as arising in the postnatal period                      |
|       | Recurrent depressive disorder, current episode severe without psychotic symptoms                       |
| F332  |                                                                                                        |
| F34   | Persistent mood affective disorders                                                                    |
| F331  | Recurrent depressive disorder, current episode moderate                                                |
| F341  | Dysthymia                                                                                              |
| F33   | Recurrent depressive disorder                                                                          |
| F329  | Depressive episode, unspecified                                                                        |
|       | Severe depressive episode without psychotic symptoms, not specified as arising in the postnatal period |
| F3220 |                                                                                                        |

#### **DEVELOPMENTAL DISORDERS**

|      |                                                                                  |
|------|----------------------------------------------------------------------------------|
| Q90  | Down's syndrome                                                                  |
| Q909 | Down's syndrome, unspecified                                                     |
| F70  | Mild mental retardation                                                          |
| F709 | Mild mental retardation without mention of impairment of behaviour               |
| F71  | Moderate mental retardation                                                      |
| F72  | Severe mental retardation                                                        |
| F79  | Unspecified mental retardation                                                   |
| F791 | Unspecified mental retardation, significant impairment of behaviour requiring at |
| F818 | Other developmental disorders of scholastic skills                               |
| F819 | Developmental disorder of scholastic skills, unspecified                         |
| F84  | Pervasive developmental disorders                                                |
| F841 | Atypical autism                                                                  |
| F845 | Asperger's syndrome                                                              |
| F848 | Other pervasive developmental disorders                                          |
| F89  | Unspecified disorder of psychological development                                |
| F840 | Childhood autism                                                                 |
| F799 | Unspecified mental retardation without mention of impairment of behaviour        |

#### **DEMENTIA DISORDERS**

|      |                                                                         |
|------|-------------------------------------------------------------------------|
| G30  | Alzheimer's disease                                                     |
| G31  | Other degenerative diseases of nervous system, not elsewhere classified |
| F00  | Dementia in Alzheimer's disease (G30.-+)                                |
| F01  | Vascular dementia                                                       |
| F019 | Vascular dementia, unspecified                                          |
| F03  | Unspecified dementia                                                    |
| F028 | Dementia in other specified diseases classified elsewhere               |

#### **SLEEP DISORDERS**

|     |                 |
|-----|-----------------|
| G47 | Sleep disorders |
|-----|-----------------|

|      |                                        |
|------|----------------------------------------|
| F51  | Nonorganic sleep disorders             |
| F510 | Nonorganic insomnia                    |
| F513 | Sleepwalking somnambulism              |
| F519 | Nonorganic sleep disorder, unspecified |

#### **SEXUAL DISORDERS**

|      |                                                               |
|------|---------------------------------------------------------------|
| F52  | Sexual dysfunction, not caused by organic disorder or disease |
| F527 | Excessive sexual drive                                        |
| F64  | Gender identity disorders                                     |
| F641 | Dual-role transvestism                                        |
| F649 | Gender identity disorder, unspecified                         |
| F650 | Fetishism                                                     |
| F652 | Exhibitionism                                                 |
| F653 | Voyeurism                                                     |
| F661 | Egodystonic sexual orientation                                |
| F669 | Psychosexual development disorder, unspecified                |
| F68  | Other disorders of adult personality and behaviour            |

#### **MANIA and BIPOLAR DISORDERS**

|      |                                                                              |
|------|------------------------------------------------------------------------------|
| F30  | Manic episode                                                                |
| F300 | Hypomania                                                                    |
| F309 | Manic episode, unspecified                                                   |
| F31  | Bipolar affective disorder                                                   |
| F310 | Bipolar affective disorder, current episode hypomanic                        |
| F311 | Bipolar affective disorder, current episode manic without psychotic symptoms |
| F312 | Bipolar affective disorder, current episode manic with psychotic symptoms    |
| F313 | Bipolar affective disorder, current episode mild or moderate depression      |
| F319 | Bipolar affective disorder, unspecified                                      |

#### **EATING DISORDERS**

|      |                              |
|------|------------------------------|
| R630 | Anorexia                     |
| F50  | Eating disorders             |
| F500 | Anorexia nervosa             |
| F502 | Bulimia nervosa              |
| F509 | Eating disorder, unspecified |

#### **OBSESSIVE COMPULSIVE DISORDERS**

|      |                                            |
|------|--------------------------------------------|
| F42  | Obsessive-compulsive disorder              |
| F429 | Obsessive-compulsive disorder, unspecified |
| F428 | Other obsessive-compulsive disorders       |

#### **SEVERE STRESS DISORDERS**

|      |                                                     |
|------|-----------------------------------------------------|
| F43  | Reaction to severe stress, and adjustment disorders |
| F430 | Acute stress reaction                               |
| F431 | Post-traumatic stress disorder                      |
| F439 | Reaction to severe stress, unspecified              |
| F438 | Other reactions to severe stress                    |

#### **BRAIN DAMAGE LEADING TO EMOTIONAL BEHAVIORAL DISORDERS**

|      |                                                                                                 |
|------|-------------------------------------------------------------------------------------------------|
| F069 | Unspecified mental disorder due to brain damage and dysfunction and to physical conditions      |
| F068 | Other specified mental disorders due to brain damage and dysfunction and to physical conditions |

|                     |
|---------------------|
| <b>PSYCHOSOCIAL</b> |
|---------------------|

|     |                                                      |
|-----|------------------------------------------------------|
| Z65 | Problems related to other psychosocial circumstances |
|-----|------------------------------------------------------|

|              |
|--------------|
| <b>OTHER</b> |
|--------------|

|       |                                                                                    |
|-------|------------------------------------------------------------------------------------|
| G20   | Parkinson's disease                                                                |
| G24   | Dystonia                                                                           |
| G258  | Other specified extrapyramidal and movement disorders                              |
| G40   | Epilepsy                                                                           |
| G80   | Cerebral palsy                                                                     |
| P961  | Neonatal withdrawal symptoms from maternal use of drugs of addiction               |
| Q8971 | Dysmorphic features                                                                |
| Q984  | Klinefelter's syndrome, unspecified                                                |
| F681  | Intentional production or feigning of symptoms or disabilities, either physical    |
| F63   | Habit and impulse disorders                                                        |
| F632  | Pathological stealing kleptomania                                                  |
| F633  | Trichotillomania                                                                   |
| F638  | Other habit and impulse disorders                                                  |
| F639  | Habit and impulse disorder, unspecified                                            |
| F441  | Dissociative fugue                                                                 |
| F446  | Dissociative anaesthesia and sensory loss                                          |
| F448  | Other dissociative conversion disorders                                            |
| F45   | Somatoform disorders                                                               |
| F450  | Somatisation disorder                                                              |
| F452  | Hypochondriacal disorder                                                           |
| F488  | Other specified neurotic disorders                                                 |
| F489  | Neurotic disorder, unspecified                                                     |
| F09   | Unspecified organic or symptomatic mental disorder                                 |
| F060  | Organic hallucinosis                                                               |
| F061  | Organic catatonic disorder                                                         |
| F0630 | Organic mood affective disorder, unspecified                                       |
| D82   | Immunodeficiency associated with other major defects                               |
| E802  | Other porphyria                                                                    |
| F99   | Mental disorder, not otherwise specified                                           |
| F44   | Dissociative conversion disorders                                                  |
| S432  | Dislocation of sternoclavicular joint                                              |
| S519  | Open wound of forearm, part unspecified                                            |
| V612  | Parent-Child Problems                                                              |
| Y10   | Poisoning by and exposure to nonopioid analgesics, antipyretics and antirheumatics |
| Z619  | Negative life event in childhood, unspecified                                      |

|      |                                                            |
|------|------------------------------------------------------------|
| Z631 | Problems in relationship with parents and in-laws          |
| Z634 | Disappearance and death of family member                   |
| Z718 | Other specified counselling                                |
| Z765 | Malingering conscious simulation                           |
| Z865 | Personal history of other mental and behavioural disorders |

## **Qualitative semi-structured interview guide questions**

We are meeting to talk about your experiences providing services at the IMH emergency department. Can you tell me a bit about yourself, and what you think is important to know about you to frame your experiences?

Please tell me about your experiences at the IMH emergency department.

Can you tell me how your team works together to deliver services?

How would you describe the typical ED user? And a typical ED frequent user?

What do you think makes the treatment of your service users difficult?

Which elements of service provision are the most challenging?

How can these challenges be lessened or overcome?
